# Supplementary material
Source: publisher figshare collection journal article supplement (https://asha.figshare.com/articles/dataset/_/19178459)
Supplement: Supplementary file 2 [file 1]

**Supplemental Material S4.** Results of exploratory analyses.

| VHI score  | Effect                                 | Estimate $\pm$ SE | p-value   |
|------------|----------------------------------------|-------------------|-----------|
| Total      | Intercept                              | 40.0 $\pm$ 11.7   | .0014**   |
|            | Timepoint                              |                   |           |
|            | Preop                                  | Reference         |           |
|            | Postop 1                               | 13.8 $\pm$ 13.8   | .3225     |
|            | Postop 2                               | -21.1 $\pm$ 14.4  | .1465     |
|            | Age $\times$ Timepoint                 |                   |           |
|            | Preop                                  | 0.3 $\pm$ 0.2     | .2745     |
|            | Postop 1                               | -0.9 $\pm$ 0.3    | .0035**   |
|            | Postop 2                               | -0.3 $\pm$ 0.3    | .4147     |
|            | Sex                                    |                   |           |
|            | Female                                 | 10.8 $\pm$ 4.4    | .0170*    |
|            | Male                                   | Reference         |           |
| Functional | Intercept                              | 20.7 $\pm$ 5.5    | .0006***  |
|            | Timepoint                              |                   |           |
|            | Preop                                  | Reference         |           |
|            | Postop 1                               | 0.7 $\pm$ 6.6     | .9163     |
|            | Postop 2                               | -4.4 $\pm$ 7.0    | .5286     |
|            | Age $\times$ Timepoint                 |                   |           |
|            | Preop                                  | 0.2 $\pm$ 0.1     | .0399*    |
|            | Postop 1                               | -0.5 $\pm$ 0.1    | .0001***  |
|            | Postop 2                               | -0.2 $\pm$ 0.1    | .0654     |
|            | Yelling: Yes vs. No                    | -4.0 $\pm$ 1.7    | .0237*    |
|            | Voice rest $\times$ Timepoint          |                   |           |
|            | Preop                                  | -1.2 $\pm$ 0.4    | .0105*    |
|            | Postop 1                               | 1.6 $\pm$ 0.6     | .0056**   |
|            | Postop 2                               | 0.5 $\pm$ 0.6     | .3600     |
| Physical   | Intercept                              | 22.4 $\pm$ 1.5    | <.0001*** |
|            | Timepoint                              |                   |           |
|            | Preop                                  | Reference         |           |
|            | Postop 1                               | -14.3 $\pm$ 1.8   | <.0001*** |
|            | Postop 2                               | -15.1 $\pm$ 1.9   | <.0001*** |
|            | Sex                                    |                   |           |
|            | Female                                 | 5.2 $\pm$ 1.5     | .0010**   |
|            | Male                                   | Reference         |           |
|            | Preop voice therapy $\times$ Timepoint |                   |           |
|            | Preop                                  | -1.1 $\pm$ 0.4    | .0078**   |
|            | Postop 1                               | 1.4 $\pm$ 0.5     | .0116*    |
|            | Postop 2                               | 1.1 $\pm$ 0.5     | .0423*    |

***Supplemental Material S4, continued.***

| <b>VHI score</b> | <b>Effect</b>                  | <b>Estimate <math>\pm</math> SE</b> | <b>p-value</b> |
|------------------|--------------------------------|-------------------------------------|----------------|
| Emotional        | Intercept                      | 14.4 $\pm$ 4.3                      | .0018**        |
|                  | Timepoint                      |                                     |                |
|                  | Preop                          | Reference                           |                |
|                  | Postop 1                       | 2.7 $\pm$ 5.1                       | .5963          |
|                  | Postop 2                       | −5.5 $\pm$ 5.4                      | .3094          |
|                  | Age (years) $\times$ Timepoint |                                     |                |
|                  | Preop                          | 0.1 $\pm$ 0.1                       | .2497          |
|                  | Postop 1                       | −0.3 $\pm$ 0.1                      | .0146*         |
|                  | Postop 2                       | −0.1 $\pm$ 0.1                      | .2730          |
|                  | Yelling: Yes vs. No            | −4.6 $\pm$ 1.6                      | .0055**        |

Effects of significant demographic and clinical variables on VHI scores in multiple regression. Solutions for fixed effects in linear mixed models for VHI total score and subscale scores with timepoint (preop, postop 1, postop 2) and significant clinical and demographic variables as fixed effects and intercepts for each patient as repeated measures: \* $p < .05$ , \*\* $p < .01$ , \*\*\* $p < .001$ .
