# Supplementary material
Source: publisher figshare collection journal article supplement (https://asha.figshare.com/articles/dataset/_/19178459)
Supplement: Supplementary file 3 [file 1]

**Supplemental Material S3.** Change in VHI Functional score before and after microflap surgery for benign vocal fold lesions by days of recommended absolute postoperative voice rest.

| <b>Timepoint</b> | <b>Estimate <math>\pm</math> SE</b> | <b><i>p</i>-value</b> |
|------------------|-------------------------------------|-----------------------|
| Preoperative     | $-0.9 \pm 0.5$                      | .0719                 |
| Postoperative 1  | $1.5 \pm 0.6$                       | .0173*                |
| Postoperative 2  | $0.4 \pm 0.6$                       | .5691                 |

Effects of voice rest on VHI Functional score in linear mixed model with recommended absolute voice rest duration in days, timepoint (preoperative, postoperative 1, postoperative 2), and their interaction as fixed effects and intercepts for each patient as repeated measures: \* $p < .05$ .
