# Supplementary material
Source: publisher figshare collection journal article supplement (https://asha.figshare.com/articles/dataset/_/19178459)
Supplement: Supplementary file 4 [file 1]

**Supplemental Material S2.** Comparison of effects of recommended voice rest and timepoint relative to microflap surgery on VHI scores with absolute voice rest duration analyzed categorically or continuously.

| VHI score  | Effect                 | Categorical |          |                 | Continuous |          |                 |
|------------|------------------------|-------------|----------|-----------------|------------|----------|-----------------|
|            |                        | <i>df</i>   | <i>F</i> | <i>p</i> -value | <i>df</i>  | <i>F</i> | <i>p</i> -value |
| Total      | Voice rest             | 2,76        | 0.18     | .8374           | 1,76       | 0.01     | .9421           |
|            | Timepoint              | 2,76        | 34.95    | < .0001***      | 2,76       | 34.90    | < .0001***      |
| Functional | Voice rest             | 2,72        | 0.03     | .9671           | 1,70       | 0.63     | .4306           |
|            | Timepoint              | 2,72        | 23.06    | < .0001***      | 2,70       | 8.18     | .0006***        |
|            | Timepoint × Voice rest | n/a         | n/a      | n/a             | 2,70       | 3.18     | .0478*          |
| Physical   | Voice rest             | 2,72        | 0.07     | .9335           | 1,72       | 0.65     | .4234           |
|            | Timepoint              | 2,72        | 44.24    | < .0001***      | 2,72       | 44.36    | < .0001***      |
| Emotional  | Voice rest             | 2,72        | 0.42     | .6593           | 1,72       | 0.43     | .5150           |
|            | Timepoint              | 2,72        | 36.48    | < .0001***      | 2,72       | 36.47    | < .0001***      |

Type 3 fixed effects in linear mixed models for VHI total score and subscale scores with recommended absolute voice rest duration category (< 7 days, 7 days, > 7 days) or continuous value (days; mean  $7.5 \pm 2.5$ , median 7, IQR 6–8, range 5–18) and timepoint (preop, postop 1, postop 2) as fixed effects and intercepts for each patient as repeated measures: \* $p < .05$ , \*\*\* $p < .001$ .
