# Supplementary material
Source: publisher figshare collection journal article supplement (https://asha.figshare.com/articles/dataset/_/19178459)

**Supplemental Material S1.** Recommended voice rest duration for all patients.

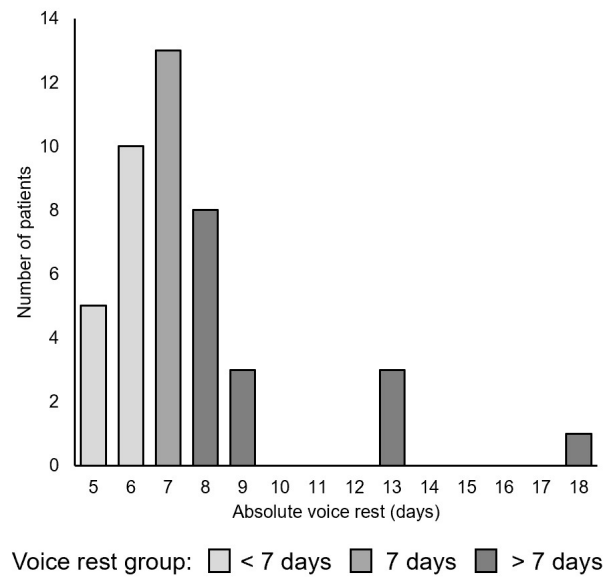

Supplement: Supplementary file 1 [file 1]
